# Supplementary material for: Genome-wide association study for the primary feather color trait in a native Chinese duck
Source: PubMed Central journal article supplement (PMC10020179; doi:10.3389/fgene.2023.1065033), 2023-03-03
Supplement: DataSheet1.pdf [file DataSheet1.pdf]

## *Supplementary Material*

**Supplementary Table 1. Basic information for SNP markers on a physical map.**

| <b>Chromosome</b> | <b>Distance (Mb)<sup>1</sup></b> | <b>No. of SNPs</b> | <b>SNP/Mb</b> | <b>No. of independent SNPs</b> | <b>Independent SNPs/Mb</b> |
|-------------------|----------------------------------|--------------------|---------------|--------------------------------|----------------------------|
| 1                 | 202.84                           | 9,911              | 48.86         | 1,507                          | 7.43                       |
| 2                 | 155.79                           | 7,488              | 48.06         | 1,217                          | 7.81                       |
| 3                 | 117.74                           | 6,116              | 51.94         | 966                            | 8.20                       |
| 4                 | 76.13                            | 4,026              | 52.88         | 619                            | 8.13                       |
| 5                 | 64.37                            | 4,252              | 66.06         | 703                            | 10.92                      |
| 6                 | 33.43                            | 2,311              | 69.13         | 428                            | 12.80                      |
| 7                 | 39.2                             | 2,120              | 54.08         | 336                            | 8.57                       |
| 8                 | 36.69                            | 2,479              | 67.57         | 385                            | 10.49                      |
| 9                 | 26.28                            | 2,163              | 82.31         | 394                            | 14.99                      |
| 10                | 19.69                            | 1,242              | 63.08         | 202                            | 10.26                      |
| 11                | 21.89                            | 2,177              | 99.45         | 354                            | 16.17                      |
| 12                | 21.28                            | 1,028              | 48.31         | 143                            | 6.72                       |
| 13                | 22.09                            | 2,066              | 93.53         | 368                            | 16.66                      |
| 14                | 18.84                            | 1,607              | 85.30         | 292                            | 15.50                      |
| 15                | 17.86                            | 1,545              | 86.51         | 234                            | 13.10                      |
| 16                | 12.63                            | 1,132              | 89.63         | 179                            | 14.17                      |

---

|       |        |        |        |        |       |
|-------|--------|--------|--------|--------|-------|
| 17    | 1.32   | 30     | 22.73  | 10     | 7.58  |
| 18    | 11.76  | 1,420  | 120.75 | 219    | 18.62 |
| 19    | 10.04  | 989    | 98.51  | 146    | 14.54 |
| 20    | 12.5   | 1,546  | 123.68 | 246    | 19.68 |
| 21    | 15.92  | 1,382  | 86.81  | 231    | 14.51 |
| 22    | 8.29   | 1,072  | 129.31 | 169    | 20.39 |
| 23    | 2.32   | 278    | 119.83 | 62     | 26.72 |
| 24    | 6.5    | 687    | 105.69 | 128    | 19.69 |
| 25    | 7.49   | 974    | 130.04 | 179    | 23.90 |
| 26    | 1.43   | 134    | 93.71  | 47     | 32.87 |
| 27    | 5.82   | 819    | 140.72 | 194    | 33.33 |
| 28    | 7.19   | 766    | 106.54 | 169    | 23.50 |
| 29    | 4.59   | 506    | 110.24 | 83     | 18.08 |
| Total | 981.92 | 62,266 | 63.41  | 10,210 | 10.40 |

---

<sup>1</sup>The physical length of the chromosome based on duck reference genome PK-2015 ([https://www.ncbi.nlm.nih.gov/genome/2793?genome\\_assembly\\_id=426073](https://www.ncbi.nlm.nih.gov/genome/2793?genome_assembly_id=426073)).

**Supplementary Table 2. Result of principal component significance test<sup>1</sup>.**

| Principal component | Eigenvalue | Difference | Twstat | P value | Effect |
|---------------------|------------|------------|--------|---------|--------|
| 1                   | 16.57      | NA         | 0.08   | 0.15    | 90.25  |
| 2                   | 12.49      | -4.08      | NA     | NA      | NA     |
| 3                   | 11.40      | -1.09      | NA     | NA      | NA     |
| 4                   | 10.55      | -0.85      | NA     | NA      | NA     |
| 5                   | 9.08       | -1.47      | NA     | NA      | NA     |
| 6                   | 8.82       | -0.26      | NA     | NA      | NA     |
| 7                   | 7.74       | -1.09      | NA     | NA      | NA     |
| 8                   | 7.27       | -0.46      | NA     | NA      | NA     |
| 9                   | 5.40       | -1.87      | NA     | NA      | NA     |
| 10                  | 4.26       | -1.14      | NA     | NA      | NA     |

Note: <sup>1</sup>Principal component significance test was conducted using EIGENSTRAT version 6.1.4 package (<https://github.com/DReichLab/EIG>).

**Supplementary Table 3. SNPs with genome-wide suggestive significance associations for plumage color trait.**

| Chr | SNP               | BP (PK-2015) <sup>1</sup> | A1/A2 | A1_MAF <sup>2</sup> | OR (95% CI) <sup>3</sup> | P-value                 | Gene                | Feature <sup>4</sup>      |
|-----|-------------------|---------------------------|-------|---------------------|--------------------------|-------------------------|---------------------|---------------------------|
| 1   | chr1:80265154 C>A | 80,265,154                | A/C   | 0.081               | 1.35 (1.19 ± 1.53)       | 6.00 × 10 <sup>-6</sup> | <i>LOC101798015</i> | UTR5                      |
| 1   | chr1:80401171 G>A | 80,401,171                | A/G   | 0.059               | 1.43 (1.24 ± 1.64)       | 1.61 × 10 <sup>-6</sup> | <i>CRYAA, SIK1</i>  | intergenic                |
| 1   | chr1:80415698 G>A | 80,415,698                | A/G   | 0.055               | 1.41 (1.22 ± 1.64)       | 6.41 × 10 <sup>-6</sup> | <i>CRYAA, SIK1</i>  | intergenic                |
| 1   | chr1:93588263 G>A | 93,588,263                | G/A   | 0.059               | 1.34 (1.18 ± 1.53)       | 1.49 × 10 <sup>-5</sup> | <i>CLIC6</i>        | intron                    |
| 2   | chr2:77662136 C>T | 77,662,136                | T/C   | 0.090               | 1.31 (1.17 ± 1.47)       | 8.07 × 10 <sup>-6</sup> | <i>PHLPP1</i>       | intron                    |
| 2   | chr2:77662182 G>A | 77,662,182                | A/G   | 0.090               | 1.31 (1.17 ± 1.47)       | 8.07 × 10 <sup>-6</sup> | <i>PHLPP1</i>       | intron                    |
| 2   | chr2:94385810 C>T | 94,385,810                | T/C   | 0.162               | 1.24 (1.13 ± 1.35)       | 2.86 × 10 <sup>-6</sup> | <i>SCGN</i>         | exon5<br>c.C338T, p.S113N |
| 4   | chr4:34697042 A>G | 34,697,042                | G/A   | 0.145               | 1.24 (1.14 ± 1.35)       | 8.80 × 10 <sup>-7</sup> | <i>ZNF827</i>       | intron                    |
| 5   | chr5:38647398 G>T | 38,647,398                | T/G   | 0.107               | 1.34 (1.19 ± 1.51)       | 2.10 × 10 <sup>-6</sup> | <i>ZNF106</i>       | intron                    |
| 5   | chr5:38647483 A>G | 38,647,483                | G/A   | 0.107               | 1.34 (1.19 ± 1.51)       | 2.10 × 10 <sup>-6</sup> | <i>ZNF106</i>       | intron                    |
| 5   | chr5:38866077 T>C | 38,866,077                | C/T   | 0.064               | 1.42 (1.23 ± 1.64)       | 3.08 × 10 <sup>-6</sup> | <i>TTBK2</i>        | intron                    |

|    |                    |            |     |       |                    |                       |                       |            |
|----|--------------------|------------|-----|-------|--------------------|-----------------------|-----------------------|------------|
| 6  | chr6:31974889 C>A  | 31,974,889 | A/C | 0.160 | 1.25 (1.13 ± 1.38) | $1.09 \times 10^{-5}$ | <i>IPMK</i>           | intron     |
| 6  | chr6:31974946 G>A  | 31,974,946 | A/G | 0.160 | 1.25 (1.13 ± 1.38) | $1.09 \times 10^{-5}$ | <i>IPMK</i>           | intron     |
| 7  | chr7:1745769 G>T   | 1,745,769  | T/G | 0.088 | 1.30 (1.16 ± 1.47) | $1.58 \times 10^{-5}$ | <i>LMO1</i>           | intron     |
| 7  | chr7:1745776 A>G   | 1,745,776  | G/A | 0.088 | 1.30 (1.16 ± 1.47) | $1.58 \times 10^{-5}$ | <i>LMO1</i>           | intron     |
| 7  | chr7:1941933 C>T   | 1,941,933  | T/C | 0.243 | 1.20 (1.11 ± 1.29) | $4.25 \times 10^{-6}$ | <i>LMO1, TRIM66</i>   | intergenic |
| 7  | chr7:1955797 A>G   | 1,955,797  | G/A | 0.241 | 1.20 (1.11 ± 1.29) | $3.66 \times 10^{-6}$ | <i>LMO1, TRIM66</i>   | intergenic |
| 11 | chr11:19528555 C>T | 19,528,555 | T/C | 0.105 | 1.31 (1.17 ± 1.47) | $4.23 \times 10^{-6}$ | <i>ZCCHC14</i>        | UTR3       |
| 11 | chr11:19656153 T>C | 19,656,153 | C/T | 0.147 | 1.26 (1.14 ± 1.39) | $9.76 \times 10^{-6}$ | <i>KLHDC4</i>         | intron     |
| 11 | chr11:19656183 T>C | 19,656,183 | T/C | 0.152 | 1.25 (1.13 ± 1.38) | $1.56 \times 10^{-5}$ | <i>KLHDC4</i>         | intron     |
| 11 | chr11:19695701 G>A | 19,695,701 | A/G | 0.097 | 1.32 (1.18 ± 1.48) | $2.01 \times 10^{-6}$ | <i>SLC7A5</i>         | intron     |
| 27 | chr27:1372970 C>A  | 1,372,970  | C/A | 0.071 | 1.31 (1.16 ± 1.49) | $1.53 \times 10^{-5}$ | <i>PLXNA2, CAMK1G</i> | intergenic |

Note: <sup>1</sup>BP, physical position based on duck reference genome PK-2015 ([https://www.ncbi.nlm.nih.gov/genome/2793?genome\\_assembly\\_id=426073](https://www.ncbi.nlm.nih.gov/genome/2793?genome_assembly_id=426073)); <sup>2</sup>MAF, minor allele frequency; <sup>3</sup>OR, odds ratio; 95% CI, 95% confidence interval; <sup>4</sup>UTR5, 5' untranslated region; UTR3, 3' untranslated region.

**Supplementary Table 4. Results of GO enrichment analysis for identified associated genes.**

| GO term                                  | ID         | <i>P</i> -value       | FDR                          | Gene                                                         |
|------------------------------------------|------------|-----------------------|------------------------------|--------------------------------------------------------------|
|                                          |            |                       | <i>P</i> -value <sup>1</sup> |                                                              |
| Nucleus                                  | GO:0005634 | $3.62 \times 10^{-4}$ | $3.67 \times 10^{-2}$        | <i>CLIC6, SIK1, LMO1, IPMK, CRYAA, SCGN, ZNF827, TTBK2</i>   |
| Protein serine/threonine kinase activity | GO:0004674 | $5.88 \times 10^{-4}$ | $3.67 \times 10^{-2}$        | <i>TTBK2, SIK1, CAMK1G</i>                                   |
| Regulation of cell migration             | GO:0030334 | $1.07 \times 10^{-3}$ | $4.33 \times 10^{-2}$        | <i>TTBK2, PLXNA2</i>                                         |
| Cytoplasm                                | GO:0005737 | $1.38 \times 10^{-3}$ | $4.33 \times 10^{-2}$        | <i>CLIC6, SIK1, IPMK, CRYAA, LOC101798015, TTBK2, PHLPP1</i> |
| Microtubule cytoskeleton organization    | GO:0000226 | $2.21 \times 10^{-3}$ | $4.51 \times 10^{-2}$        | <i>TTBK2, SIK1</i>                                           |
| Peptidyl-serine phosphorylation          | GO:0018105 | $3.86 \times 10^{-3}$ | $4.51 \times 10^{-2}$        | <i>TTBK2, CAMK1G</i>                                         |
| Semaphorin receptor complex              | GO:0002116 | $4.77 \times 10^{-3}$ | $4.51 \times 10^{-2}$        | <i>PLXNA2</i>                                                |
| Entrainment of circadian clock           | GO:0009649 | $4.77 \times 10^{-3}$ | $4.51 \times 10^{-2}$        | <i>PHLPP1</i>                                                |
| Anoikis                                  | GO:0043276 | $5.56 \times 10^{-3}$ | $4.51 \times 10^{-2}$        | <i>SIK1</i>                                                  |
| Transsulfuration                         | GO:0019346 | $5.56 \times 10^{-3}$ | $4.51 \times 10^{-2}$        | <i>LOC101798015</i>                                          |

<sup>1</sup>FDR, false discovery rate, using Benjamini and Hochberg method.

**Supplementary Table 5. Results of pathway enrichment analysis for identified associated genes.**

---

| <b>Gene</b>         | <b>Pathway</b>                                                                                                                    |
|---------------------|-----------------------------------------------------------------------------------------------------------------------------------|
| <i>LOC101798015</i> | Glycine, serine and threonine metabolism; Cysteine and methionine metabolism; Biosynthesis of amino acids; and Metabolic pathways |
| <i>IPMK</i>         | Inositol phosphate metabolism; Phosphatidylinositol signaling system; Metabolic pathways                                          |
| <i>SLC7A5</i>       | mTOR signaling pathway                                                                                                            |
| <i>CRYAA</i>        | Protein processing in endoplasmic reticulum                                                                                       |
| <i>CAMK1G</i>       | Calcium signaling pathway                                                                                                         |

---

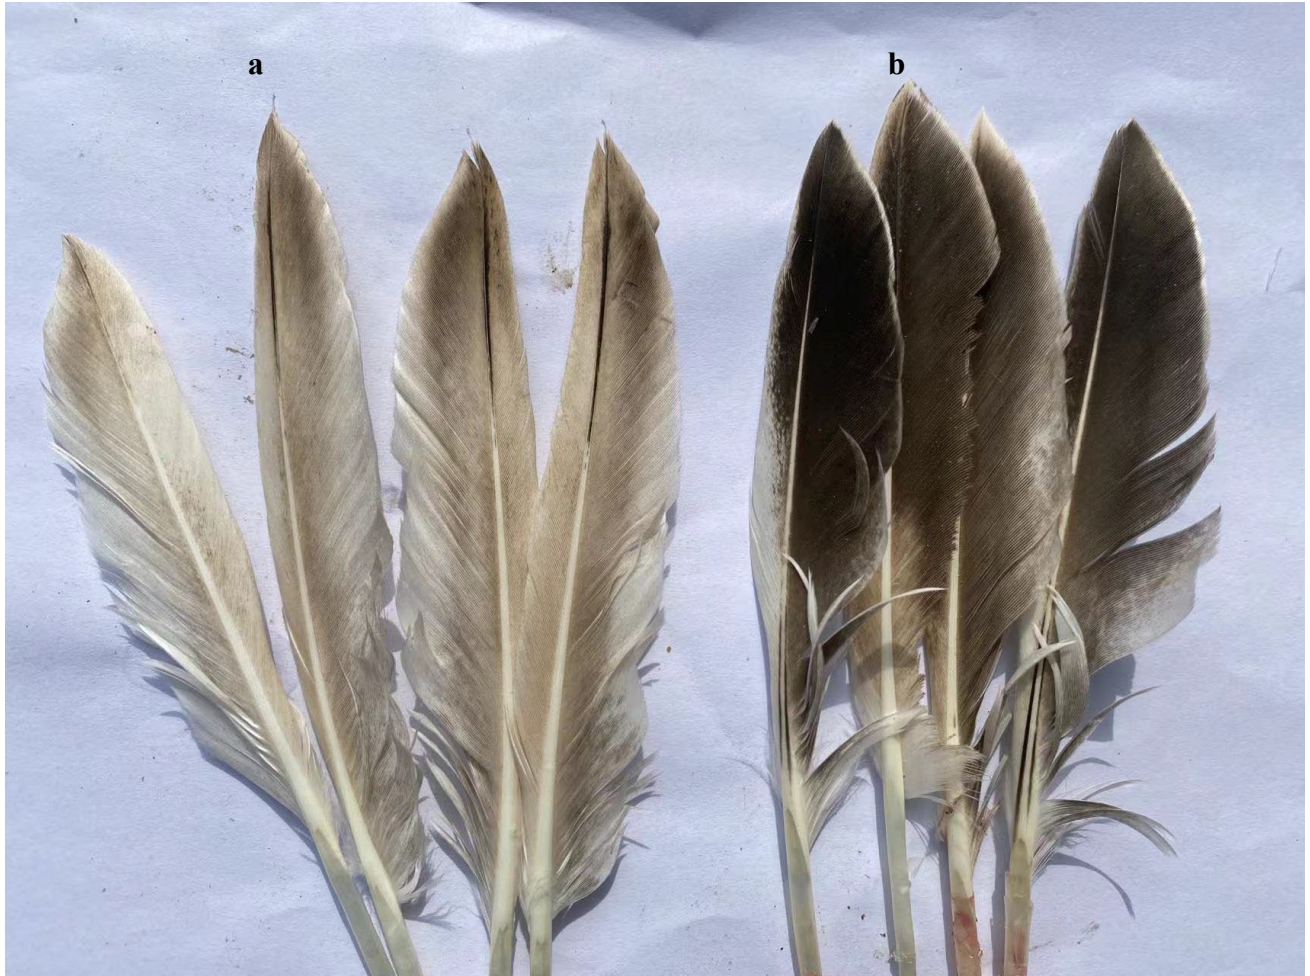

**Supplementary Figure 1. Pockmarked (a) and black (b) feathers traits of Longyan Shan-ma duck.**
